# Supplementary material for: The AnUFGT1 Is Involved in the Anthurium ‘Alabama’ Anthocyanidin Deficiency
Source: MDPI journal article supplement (doi:10.3390/horticulturae10040369), 2024-04-06
Supplement: s1 [file s1]

Archive with 1 entries (1 files):
- horticulturae-2911845-supplementary.pdf
